# Supplementary material for: Genome-Based Retrospective Analysis of a Providencia stuartii Outbreak in Rome, Italy: Broad Spectrum IncC Plasmids Spread the NDM Carbapenemase within the Hospital
Source: MDPI journal article supplement (doi:10.3390/antibiotics12050943), 2023-05-22
Supplement: s1 [file s1]

**Table S1:** Clinical information

| Patient     | Age/<br>sex | COVID-19 | Lenght of<br>stay<br>(days) | CM   | Previous<br>(90-d)<br>hospitalizati<br>on | Previous<br>(90-d)<br>antibiotic<br>therapy | Previous<br>(90-d)<br>carbapene<br>m therapy | Ward of<br>isolation | Presence of<br>NDM<br>microorgan<br>ism in the<br>ward | Type of<br>sample<br>(first<br>isolation) | Previous<br>NDM<br>colonization | Infection/<br>colonization | Antibiotic<br>therapy<br>for NDM<br>infection | Outcome  |
|-------------|-------------|----------|-----------------------------|------|-------------------------------------------|---------------------------------------------|----------------------------------------------|----------------------|--------------------------------------------------------|-------------------------------------------|---------------------------------|----------------------------|-----------------------------------------------|----------|
| <b>Pt#1</b> | 52/M        | Yes      | 33                          | None | Yes                                       | Yes                                         | No                                           | COVID-19<br>ICU      | Yes                                                    | Rectal<br>swab                            | No                              | Colonization               | NA                                            | Death    |
| <b>Pt#2</b> | 50/M        | Yes      | 23                          | None | No                                        | Yes                                         | No                                           | COVID-19<br>ICU      | Yes                                                    | Rectal<br>swab                            | No                              | Colonization               | NA                                            | Death    |
| <b>Pt#3</b> | 65/M        | No       | 37                          | None | Yes                                       | Yes                                         | No                                           | General<br>ICU       | No                                                     | TBA                                       | No                              | Infection<br>(VAP, UTI)    | CZA+AZ<br>T                                   | Survived |
| <b>Pt#4</b> | 36/M        | Yes      | 168                         | HTN  | No                                        | Yes                                         | No                                           | COVID-19<br>ICU      | Yes                                                    | Rectal<br>swab                            | Yes                             | Infection<br>(VAP, UTI)    | CZA+AZ<br>T                                   | Survived |

CM: comorbidity; HTN: hypertension; ICU: Intensive Care Unit; TBA: tracheal aspirate; VAP: ventilator associated pneumonia; UTI: Urinary Tract Infection; CZA: ceftazidime/avibactam; AZT: aztreonam.

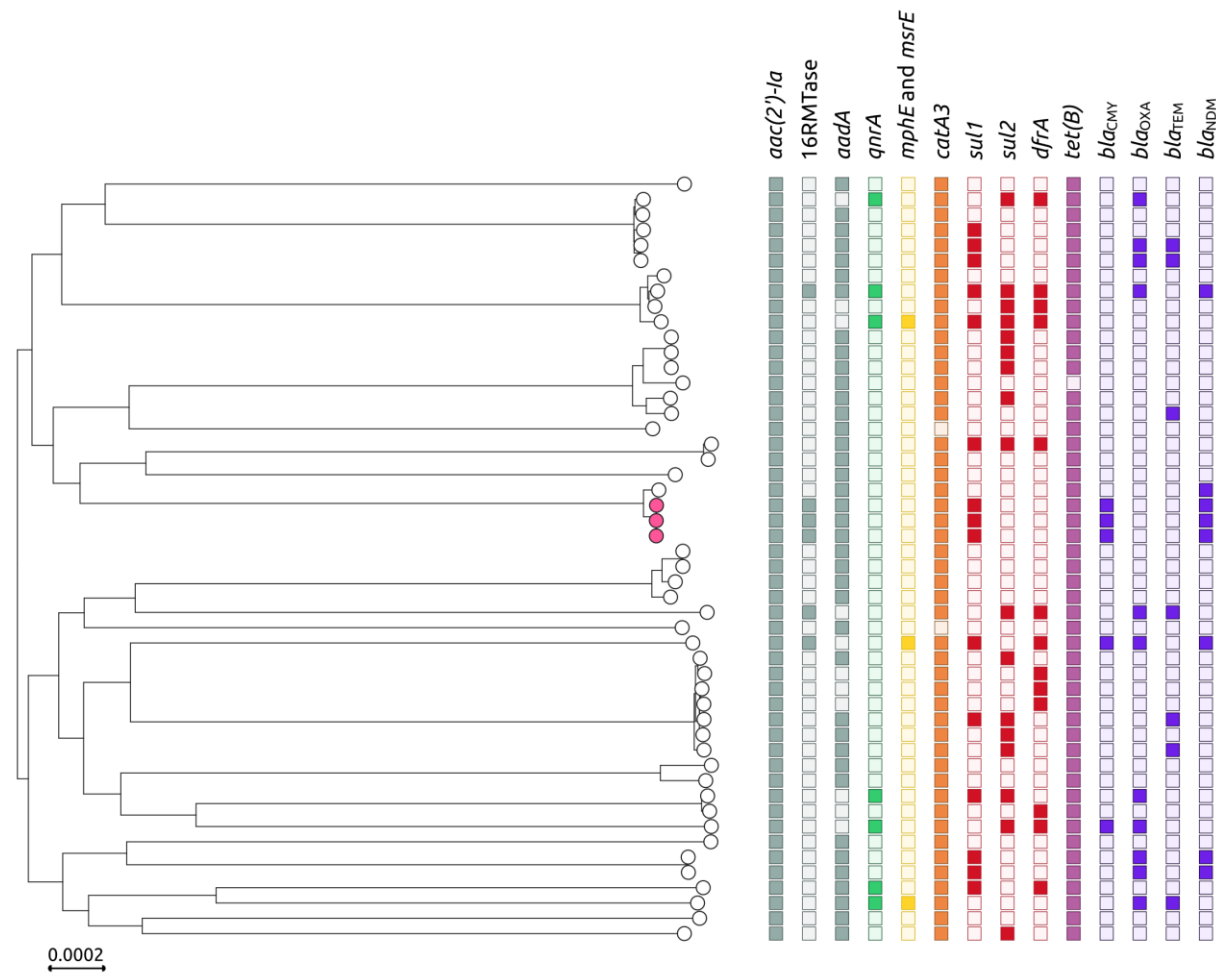

**Figure S1. Phylogenetic tree of *Providencia stuartii*.** Phylogenetic tree of 50 *Providencia* genomes (57 retrieved from the NCBI RefSeq database and 3 from this study) based on the concatenation of 2,065 core genes. Metadata represent the various resistance genes carried by the strains, and are color-coded according to the antibiotic class. The three isolates sequenced in this study are indicated by magenta dots.
