# Supplementary material for: Genome-Based Retrospective Analysis of a Providencia stuartii Outbreak in Rome, Italy: Broad Spectrum IncC Plasmids Spread the NDM Carbapenemase within the Hospital
Source: Antibiotics (Basel). 2023 May 22;12(5):943. doi: 10.3390/antibiotics12050943 (PMC10215782; doi:10.3390/antibiotics12050943)
Supplement: Supplementary file 1 [file antibiotics-12-00943-s001.zip › Suppl. Dataset.xlsx]

## Sheet: snippy
Reference	Query	POS	TYPE	REF	ALT	NT_POS	AA_POS	EFFECT	GENE	PRODUCT
41	65	532567	ins	G	GC	140/1083	47/360	frameshift_variant c.140_141insG p.Thr48fs	mexH	efflux transporter periplasmic adaptor subunit
41	65	1495692	snp	G	A	2046/4134	682/1377	synonymous_variant c.2046G>A p.Ala682Ala		peptidylprolyl isomerase
41	65	1495827	snp	G	A	2181/4134	727/1377	synonymous_variant c.2181G>A p.Ala727Ala		peptidylprolyl isomerase
41	65	4083344	mnp	CA	TC	365/2571	122/856	missense_variant c.364_365delTGinsGA p.Trp122Glu	cyaA	adenylate cyclase
41	65	4260700	snp	G	A	353/393	118/130	stop_gained c.353G>A p.Trp118*		Glyco-trans-4-like-N domain-containing protein
41	883	532567	ins	G	GC	140/1083	47/360	frameshift_variant c.140_141insG p.Thr48fs	mexH	efflux transporter periplasmic adaptor subunit
41	883	1495827	snp	G	A	2181/4134	727/1377	synonymous_variant c.2181G>A p.Ala727Ala		peptidylprolyl isomerase
65	883	652251	snp	T	C	2676/4134	892/1377	synonymous_variant c.2676A>G p.Ala892Ala		peptidylprolyl isomerase
65	883	652305	snp	A	G	2622/4134	874/1377	synonymous_variant c.2622T>C p.Ala874Ala		peptidylprolyl isomerase
65	883	1242917	mnp	CA	TC	365/2571	122/856	missense_variant c.364_365delTGinsGA p.Trp122Glu	cyaA	adenylate cyclase
65	883	1420272	snp	G	A	353/393	118/130	stop_gained c.353G>A p.Trp118*		Glyco-trans-4-like-N domain-containing protein
